# Supplementary material
Source: publisher figshare collection journal article supplement (https://acs.figshare.com/ndownloader/files/4519948)
Supplement: Supplementary file 1 [file 4519948]

Supporting Information  
for  
Stereocomplex Formation between Enantiomeric  
Substituted Poly(lactide)s: Blends of  
Poly[(S)-2-hydroxybutyrate] and  
Poly[(R)-2-hydroxybutyrate]

*Hideto Tsuji\* and Ayaka Okumura*

*Department of Ecological Engineering, Faculty of Engineering,*

*Toyohashi University of Technology,*

*Tempaku-cho, Toyohashi, Aichi 441-8580, Japan*

## Appendices for Synthetic Procedure and Characterization of P(S-2HB) and P(R-2HB)

**Synthetic Procedure.** The polycondensation of (S)- or (R)-2-hydroxybutanoic acid was carried out with 2.5 wt% of p-toluenesulfonic acid under a constant nitrogen gas flow and atmospheric pressure for 5 hours, and then at a reduced pressure of 2.2 kPa (17 mmHg) for 24 hours. The polycondensation reaction was carried out in the molten state of (S)- or (R)-2-hydroxybutanoic at 130°C, which is above the melting temperature ( $T_m$ ) of (S)- or (R)-2-hydroxybutanoic (45-50°C).

**Polarimetry.** The specific optical rotation ( $[\alpha]_{589}^{25}$  per unit mass or per unit mol) values of synthesized P(S-2HB) and P(R-2HB) were measured in chloroform at a concentration of 1 g dL<sup>-1</sup> and 25°C using a JASCO P-2100 polarimeter at a wave length of 589 nm. The  $[\alpha]_{589}^{25}$  values per unit mass of P(S-2HB) and P(R-2HB) were -117 and 114 deg dm<sup>-1</sup> g<sup>-1</sup> cm<sup>3</sup>, respectively, confirming optical activity of the synthesized polymers. These values were slightly lower than 130 and -121 deg dm<sup>-1</sup> g<sup>-1</sup> cm<sup>3</sup> of PLLA and PDLA having similar  $M_n$  values of 2.7 and 3.0x10<sup>3</sup> g mol<sup>-1</sup>, respectively. The  $[\alpha]_{589}^{25}$  values of PLLA and PDLA with  $M_n$  exceeding 10<sup>5</sup> g mol<sup>-1</sup> were reported to be -156 and 156 deg dm<sup>-1</sup> g<sup>-1</sup> cm<sup>3</sup>, respectively, whose absolute values are respectively 26 and 35 deg dm<sup>-1</sup> g<sup>-1</sup> cm<sup>3</sup> higher than those with having lower  $M_n$  values of 2.7 and 3.0x10<sup>3</sup> g mol<sup>-1</sup>. That is, the higher number of end groups of low-molecular-weight PLLA and PDLA per unit mass is suggested to reduce the absolute  $[\alpha]_{589}^{25}$  values.<sup>21</sup> Considering this effect of overall molecular weight, the absolute  $[\alpha]_{589}^{25}$  values of P(S-2HB) and P(R-2HB) with  $M_n$  exceeding 10<sup>5</sup> g mol<sup>-1</sup> may be several tens of deg dm<sup>-1</sup> g<sup>-1</sup> cm<sup>3</sup> higher than those in the present study. However, the lower absolute  $[\alpha]_{589}^{25}$  values per unit mass of P(S-2HB) and P(R-2HB) compared to those of PLLA and PDLA are mainly

due to the relatively higher molecular weight of the monomer unit ( $86.1 \text{ g mol}^{-1}$ ) of P(2HB) compared to that of PLA ( $72.1 \text{ g mol}^{-1}$ ). The  $[\alpha]_{589}^{25}$  values per unit mass of P(S-2HB) and P(R-2HB) can be converted to those per unit mol ( $-1.0 \times 10^4$  and  $9.8 \times 10^3 \text{ dm}^{-1} \text{ mol}^{-1} \text{ cm}^3$ , respectively). These values are very similar to the  $[\alpha]_{589}^{25}$  values per unit mol of PLLA and PDLA ( $-9.4 \times 10^3$  and  $8.7 \times 10^3 \text{ dm}^{-1} \text{ mol}^{-1} \text{ cm}^3$ , respectively) and in agreement with the  $[\alpha]_{589}^{25}$  values per unit mol of PLLA and PDLA ( $-1.0 \times 10^4$  and  $9.3 \times 10^3 \text{ dm}^{-1} \text{ mol}^{-1} \text{ cm}^3$ ), which values are corrected to remove the effect of the incorporated coinitiator (dodecanol) unit. This finding suggests that the helical nature of P(S-2HB) and P(R-2HB) in solution is very similar to that of PLLA and PDLA and the very high optical purities of P(S-2HB) and P(R-2HB), comparable to those of PLLA and PDLA (ca.95% or higher).

**$^1\text{H}$  NMR Spectroscopy.** The 400 MHz  $^1\text{H}$  NMR spectra of synthesized P(S-2HB) and P(R-2HB) were obtained in deuterated chloroform ( $50 \text{ mg mL}^{-1}$ ) by a Varian UNITY-400P Spectrometer using tetramethylsilane as the internal standard. The methine triplet, methylene multiplet, and methyl triplet peaks were observed at around 5.1, 2.0, and 1.0 ppm, respectively.

**Table S1. Thermal properties of P(S-2HB), P(R-2HB), P(S-2HB)/P(R-2HB) stereocomplexes, PLLA, PDLA, and PLLA/PDLA stereocomplex during heating from 0°C**

| Specimen                           | Crystallization conditions |            | $T_g^{b)}$<br>(°C) | $T_{cc}^{b)}$<br>(°C) | $T_m^{b)}$<br>(°C) | $\Delta H_{cc}^{c)}$<br>(J g <sup>-1</sup> ) | $\Delta H_m^{c)}$<br>(J g <sup>-1</sup> ) | $\Delta H_{cc} + \Delta H_m^{c)}$<br>(J g <sup>-1</sup> ) |
|------------------------------------|----------------------------|------------|--------------------|-----------------------|--------------------|----------------------------------------------|-------------------------------------------|-----------------------------------------------------------|
|                                    | Method <sup>a)</sup>       | Temp. (°C) |                    |                       |                    |                                              |                                           |                                                           |
| P(S-2HB)                           | S                          | 25         | 26.7               | 70.1                  | 102.5, 116.6       | -6.3                                         | 34.7                                      | 28.4                                                      |
| P(R-2HB)                           |                            |            | 26.9               | 79.5                  | 101.0, 115.3       | -6.1                                         | 36.0                                      | 29.9                                                      |
| P(S-2HB)/P(R-2HB) SC <sup>d)</sup> |                            |            | 40.9               | -                     | 211.7              | 0                                            | 63.9                                      | 63.9                                                      |
| P(S-2HB)                           | M                          | 70         | - <sup>e)</sup>    | -                     | 103.2              | 0                                            | 36.6                                      | 36.6                                                      |
| P(R-2HB)                           |                            | 70         | - <sup>e)</sup>    | -                     | 101.6              | 0                                            | 35.1                                      | 35.1                                                      |
| P(S-2HB)/P(R-2HB) SC <sup>d)</sup> |                            | 130        | 38.8               | -                     | 198.2              | 0                                            | 64.0                                      | 64.0                                                      |
| PLLA <sup>f)</sup>                 | M                          | 120        | - <sup>e)</sup>    | - <sup>e)</sup>       | 111.1, 131.9       | -2.8                                         | 48.2                                      | 45.4                                                      |
| PDLA <sup>f)</sup>                 |                            |            | - <sup>e)</sup>    | 60.5                  | 107.1, 138.2       | -5.7                                         | 35.8                                      | 30.1                                                      |
| PLLA/PDLA SC <sup>d,f)</sup>       |                            |            | 43.2               | -                     | 194.8              | 0                                            | 91.0                                      | 91.0                                                      |

<sup>a)</sup> S and M represent solution- and melt-crystallization, respectively.

<sup>b)</sup>  $T_g$ ,  $T_{cc}$ , and  $T_m$  are glass transition, cold crystallization, and melting temperatures, respectively.

<sup>c)</sup>  $\Delta H_{cc}$  and  $\Delta H_m$  are enthalpies of cold crystallization and melting, respectively.

<sup>d)</sup> Stereocomplex.

<sup>e)</sup> Too diffuse to be evaluated.

<sup>f)</sup> Unpublished data for PLLA ( $M_n=2.7 \times 10^3$  g mol<sup>-1</sup>,  $M_w/M_n=1.5$ ) and PDLA ( $M_n=3.0 \times 10^3$  g mol<sup>-1</sup>,  $M_w/M_n=1.9$ ) crystallized at  $T_c$  of 120°C from the melt (pure PLLA, PDLA, PLLA/PDLA blend specimens and the procedures for obtaining WAXS and DSC data are the same as those reported in *Macromol. Chem. Phys.*, **2009**, 210, 993-1002).

**Table S2. The interplane distance ( $d$ ) values of P(S-2HB), P(R-2HB), P(S-2HB)/P(R-2HB) stereocomplex crystals, assuming that the P(2HB) specimens have the same crystalline lattice types as those of the PLA specimens, together with those of the PLA specimens**

| Specimen                           | Crystallization conditions |            | $d$ (nm) [ $2\theta$ (degrees)] |              |              |                               |              |
|------------------------------------|----------------------------|------------|---------------------------------|--------------|--------------|-------------------------------|--------------|
|                                    | Method <sup>a)</sup>       | Temp. (°C) | (100)                           | (110)/(200)  | (203)        | (110)                         | (210)        |
| P(S-2HB)                           | S                          | 25         |                                 | 0.599 [14.8] | 0.513 [17.3] |                               |              |
| P(R-2HB)                           |                            |            |                                 | 0.603 [14.7] | 0.516 [17.2] |                               |              |
| P(S-2HB)/P(R-2HB) SC <sup>b)</sup> |                            |            | 0.827 [10.7]                    |              |              | 0.480 [18.5],<br>0.460 [19.3] | 0.415 [21.4] |
| P(S-2HB)                           | M                          | 70         |                                 | 0.603 [14.7] | 0.516 [17.2] |                               |              |
| P(R-2HB)                           |                            | 70         |                                 | 0.603 [14.7] | 0.516 [17.2] |                               |              |
| P(S-2HB)/P(R-2HB) SC <sup>b)</sup> |                            | 130        | 0.827 [10.7]                    |              |              | 0.480 [18.5],<br>0.460 [19.3] | 0.413 [21.5] |
| PLLA <sup>c)</sup>                 | M                          | 120        |                                 | 0.531 [16.7] | 0.467 [19.0] |                               |              |
| PDLA <sup>c)</sup>                 |                            |            |                                 | 0.531 [16.7] | 0.465 [19.1] |                               |              |
| PLLA/PDLA SC <sup>b,c)</sup>       |                            |            | 0.744 [11.9]                    |              |              | 0.429 [20.7]                  | 0.372 [23.9] |

<sup>a)</sup> S and M represent solution- and melt-crystallization, respectively.

<sup>b)</sup> Stereocomplex

<sup>c)</sup> Unpublished data for PLLA ( $M_n=2.7 \times 10^3$  g mol<sup>-1</sup>,  $M_w/M_n=1.5$ ) and PDLA ( $M_n=3.0 \times 10^3$  g mol<sup>-1</sup>,  $M_w/M_n=1.9$ ) crystallized at  $T_c$  of 120°C from the melt (pure PLLA, PDLA, PLLA/PDLA blend specimens and the procedures for obtaining WAXS and DSC data are the same as those reported in *Macromol. Chem. Phys.*, **2009**, 210, 993-1002).
